# Supplementary material for: Differential DNA Methylation is associated with Hippocampal Abnormalities in Pediatric Posttraumatic Stress Disorder
Source: Research Square preprint supplement (doi:10.21203/rs.3.rs-87419/v1), 2020-10-23
Supplement: Supplementary file 1 [file 6e7ad8c42c49cc8f04a23a14.docx]

**STable 2a:** Top 5 DMPs identified in the PTSD vs non-traumatized control groups, and PTSD vs traumatized controls group in the Dutch cohort

| **PTSD Youth vs.**  **NTC Youth** | **Gene** | **Probe** | **Chr** | **Position** | **m-value** | **FDR** | **Log Beta** | **Delta Beta** | **Gene Feature** |
| --- | --- | --- | --- | --- | --- | --- | --- | --- | --- |
| ***CRHBP*** | **cg26196496** | **5** | **76247679** | **2,63E-08** | **0,0204** | **0,1314** | **0,1634** | **TSS1500** |
| *LINC00379* | cg22797297 | 13 | 91807638 | 7,60E-07 | 0,1785 | -0,0828 | -0,1111 | Body |
| *-* | cg11717701 | 4 | 55408833 | 9,02E-07 | 0,1785 | 0,0538 | -0,0002 | - |
| *RN5S96* | cg17852114 | 2 | 69410331 | 9,19E-07 | 0,1785 | -0,0135 | -0,0130 | Body |
| *AC092567.1* | cg12139537 | 2 | 62972370 | 1,36E-06 | 0,1937 | -0,0257 | -0,0060 | body |
|  | | | | | | | | | |
| **PTSD Youth vs.**  **TC Youth** | ***-*** | **cg21972431** | **7** | **17812356** | **2,30E-08** | **0,0179** | **-0,0275** | **-0,0108** | **-** |
| *PPP1R16B* | cg12221474 | 20 | 37433936 | 2,75E-07 | 0,0675 | -0,0246 | -0,0208 | TSS1500 |
| *-* | cg0694353 | 6 | 142007733 | 3,88E-07 | 0,0675 | -0,1512 | -0,1417 | - |
| *ZEB2* | cg20171775 | 2 | 145228686 | 4,37E-07 | 0,0675 | 0,1088 | 0,0704 | 3'UTR |
| *FAM180A* | cg11015893 | 7 | 135433540 | 4,60E-07 | 0,0675 | 0,0279 | 0,0049 | 1stExon |
|  | | | | | | | | | |
| **TC Youth vs.**  **NTC Youth** | *KIAA1949* | cg18335326 | 6 | 30653659 | 2,51E-06 | 0,7123 | 0,0290 | 0,0243 | Body;1stExon |
| *URI1* | cg23798674 | 19 | 30433017 | 3,11E-06 | 0,7123 | -0,0100 | -0,0089 | TSS200 |
| *CNN2* | cg10658703 | 19 | 1033242 | 5,27E-06 | 0,7123 | 0,0209 | -0,0208 | Body |
| *RAD51B* | cg13898955 | 14 | 68555990 | 7,19E-06 | 0,7123 | -0,0453 | -0,0293 | Body |
| *-* | cg20230271 | 13 | 95190074 | 8,01E-06 | 0,7123 | 0,0307 | 0,0358 | - |

Top 5 DMPs of association analyses of (1) PTSD vs NTC youth, (2) PTSD vs TC youth and 3) TC vs NTC youth. Gene: UCSC Reference Gene Name, chr: chromosome; m-value: adjusted p-value (Mval); DeltaBeta: delta differences between groups, based on average β-value. DMP: Differently methylated position: Gene feature: gene feature according Illumina manifest. PTSD = Post-Traumatic Stress Disorder; NTC = Non-Traumatized Controls, TC = Traumatized controls.

**STable 2b:** Top 5 DMPs identified in the PTSD vs non-traumatized control groups in the USA cohort

| **PTSD Youth vs.**  **NTC Youth** | **Gene** | **Probe** | **Chr** | **Position** | **m-value** | **FDR** | **Log Beta** | **Delta Beta** | **Gene Feature** |
| --- | --- | --- | --- | --- | --- | --- | --- | --- | --- |
| *SORBS1* | cg12639763 | 10 | 97321104 | 4.94E-07 | 0.327068412 | -0.0073432 | -0.0061897 | 5’ UTR |
| *CACNG8* | cg17780246 | 19 | 54481467 | 2.69E-06 | 0.254915768 | -0.0677602 | -0.061728 | Body |
| *LPGAT1* | cg05959111 | 1 | 211999985 | 2.97E-06 | 0.254915768 | -0.0585573 | -0.0588481 | Body |
| *DLGAP2* | cg05455971 | 8 | 1616422 | 2.51E-06 | 0.254915768 | 0.04179431 | 0.03864045 | Body |
| *SHPK* | cg02501127 | 17 | 3530781 | 5.34E-06 | 0.105837742 | -0.0266202 | -0.0254701 | Body |

Top 5 DMPs of association analyses of PTSD vs. NTC youth; Gene: UCSC Reference Gene Name, Chr = chromosome; Delta Beta = delta differences between groups, based on average β-value. DMP: Differently methylated position Gene feature: gene feature according Illumina manifest. PTSD = Post-Traumatic Stress Disorder; NTC = Non-Traumatized Controls.
